# Supplementary material
Source: publisher figshare collection journal article supplement (https://frontiersin.figshare.com/ndownloader/files/17852528)
Supplement: Supplementary file [file 17852528]

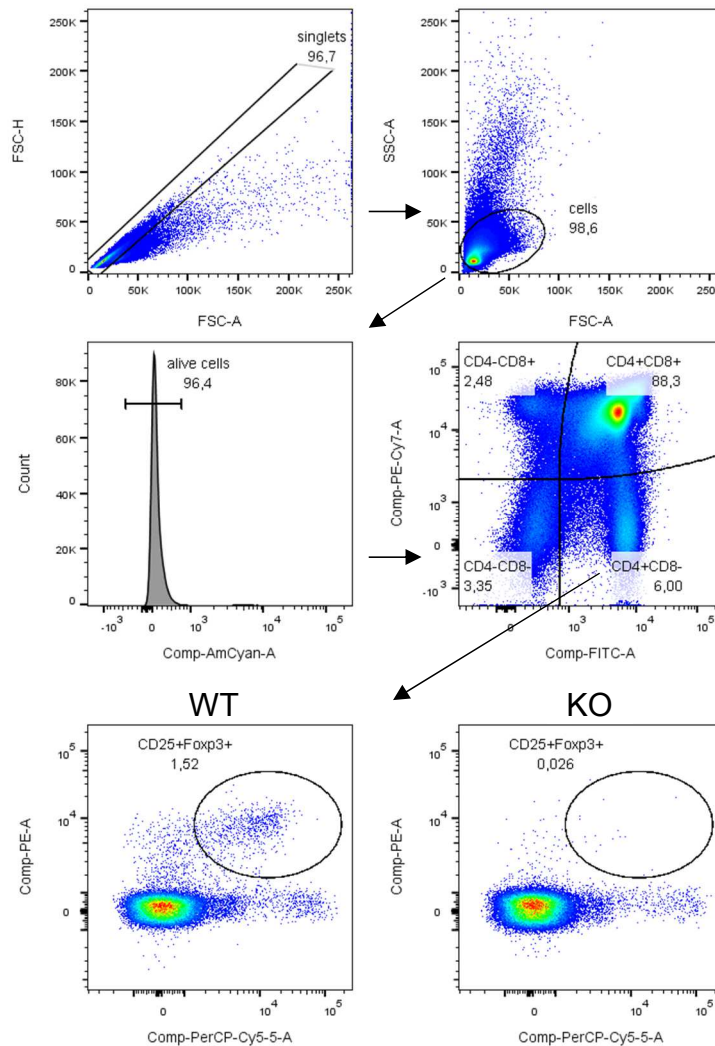

**Supplementary Figure 1: Gating strategy for thymic Tregs (CD4<sup>+</sup> CD8<sup>-</sup> CD25<sup>+</sup> FoxP3<sup>+</sup>) of *Malt1*-KO and WT mice**

Singlets: FSC-A and FSC-H; cells: FSC-A and SSC-A; living cells: FSC-A and L/D eFluor506 negative; CD4<sup>+</sup> CD8<sup>-</sup> T cells: anti-CD4-FITC positive and anti-CD8-PE-Cy7 negative; Tregs (Foxp3<sup>+</sup>CD25<sup>+</sup>CD4<sup>+</sup> T cells): anti-Foxp3-PE and anti-CD25-PercPcy5.5 positive.

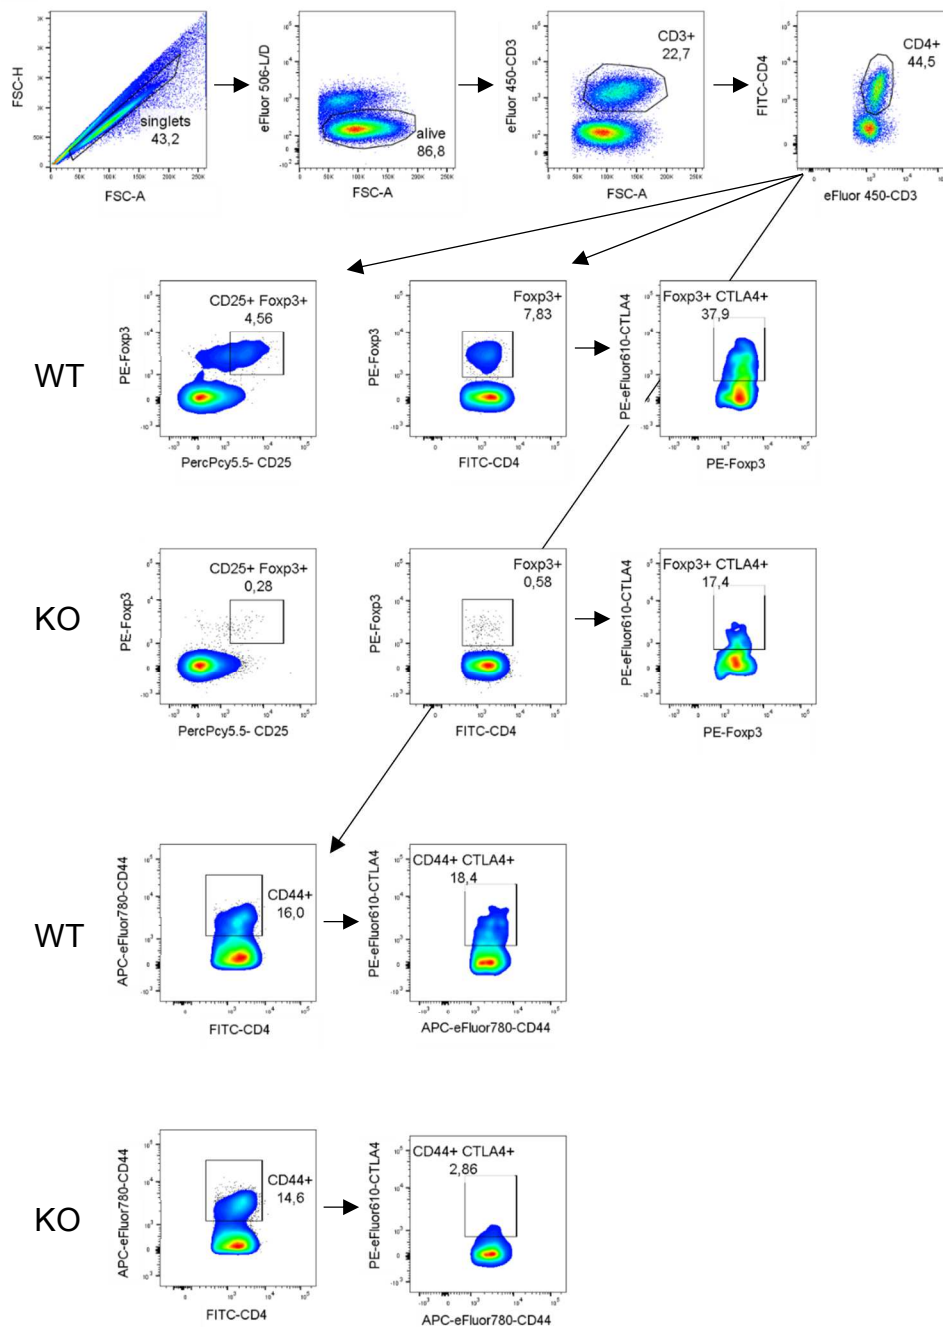

**Supplementary Figure 2: Gating strategy for CTLA4<sup>+</sup> Foxp3<sup>+</sup> CD4<sup>+</sup> T cells and CTLA4<sup>+</sup> CD44<sup>+</sup> CD4<sup>+</sup> T cells of *Malt1*-KO and WT mice**

Singlets: FSC-A and FSC-H; cells: FSC-A and SSC-A; living cells: FSC-A and L/D eFluor506 negative; CD4<sup>+</sup> T cells: anti-CD3-eFluor and anti-CD4-FITC positive; Tregs (Foxp3<sup>+</sup> CD25<sup>+</sup> CD4<sup>+</sup> T cells): anti-Foxp3-PE and anti-CD25-PercPcy5.5 positive; surface CTLA4<sup>+</sup> Tregs: anti-Foxp3-PE and anti-CTLA4-PEeFluor610; surface CTLA4<sup>+</sup> CD44<sup>+</sup> CD4<sup>+</sup> T cells: anti-CD44-APC-eFluor780 and anti-CTLA4-PEeFluor610 positive.

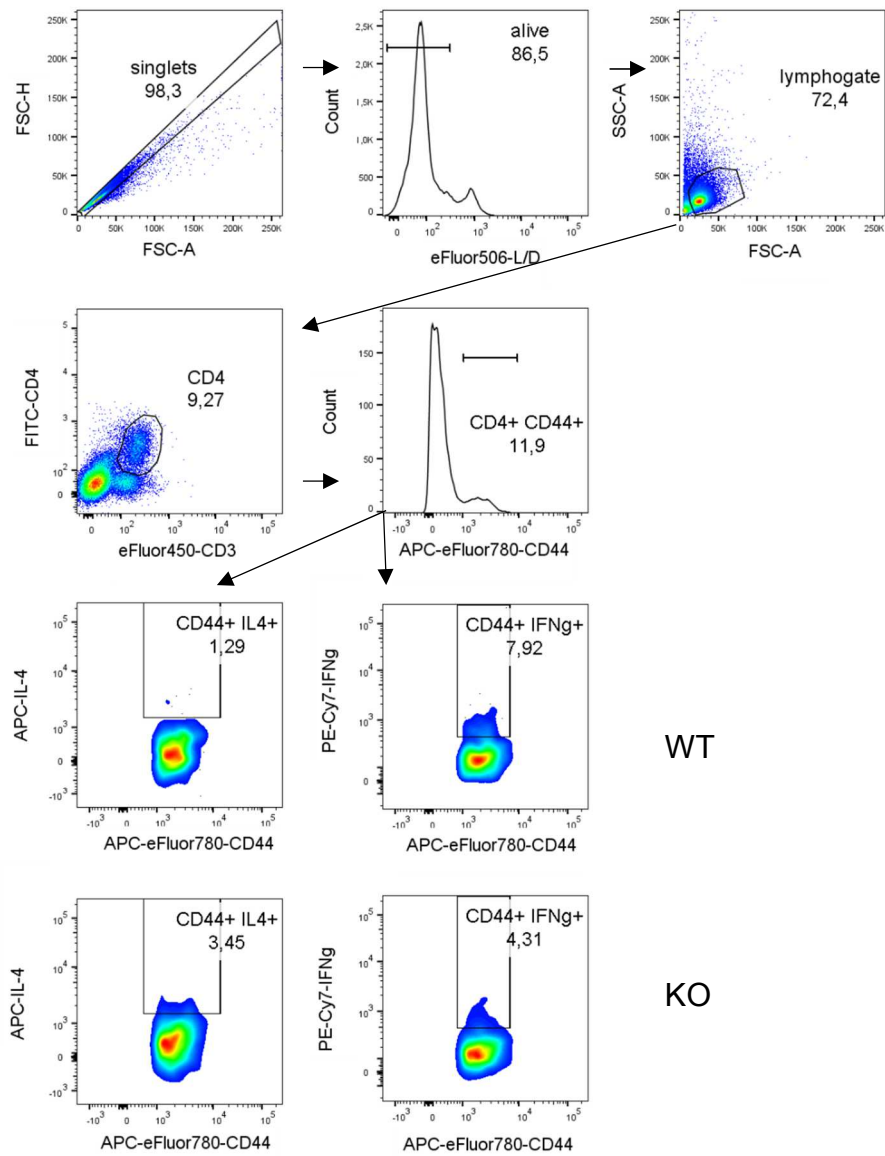

**Supplementary Figure 3: Gating strategy for Th1 and Th2 cells of *Malt1*-KO and WT mice**

Singlets: FSC-A and FSC-H; living cells: histogram L/D eFluor506 negative; cells (lymphogate): FSC-A and SSC-A; CD4<sup>+</sup> T cells: anti-CD3-eFluor and anti-CD4-FITC positive; CD44<sup>+</sup> CD4<sup>+</sup> T cells: histogram anti-CD44-APCeFluor780 positive; Th1 cells: anti-CD44-APCeFluor and anti-IFN-γ-PEcy7 positive; Th2 cells: anti-CD44-APCeFluor and anti-IL-4-APC positive.

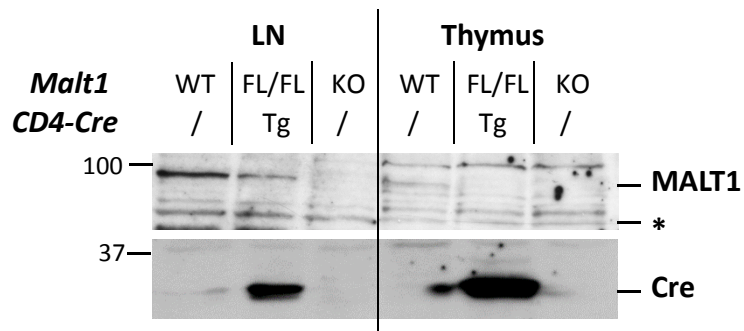

**Supplementary Figure 4: Western blot showing *CD4-Cre* specific MALT1 loss in lymph nodes and thymus**

Thymus (T cells) or lymph nodes (LN; mainly T cells and B cells) from *Malt1*-WT, *Malt1*<sup>FL/FL</sup> *CD4-Cre*<sup>Tg/+</sup> and *Malt1*-KO mice were lysed in E1A buffer and equal amounts of protein (100µg) were run on SDS-PAGE and blotted. The western blot was developed with an anti-MALT1 antibody recognizing murine MALT1 (top panel) and an anti-Cre recombinase antibody (lower panel). Aspecific band (\*) was used as loading control.
